# Supplementary material for: A cost-effective system for differentiation of intestinal epithelium from human induced pluripotent stem cells
Source: PubMed Central journal article supplement (PMC4663490; doi:10.1038/srep17297), 2015-11-30

# **A cost-effective system for differentiation of intestinal epithelium from human induced pluripotent stem cells**

**Soichiro Ogaki**<sup>1,2,3,4,5,\*</sup>, **Mayu Morooka**<sup>1,\*</sup>, **Kaito Otera**<sup>1</sup> and **Shoen Kume**<sup>8,1,3</sup>

## **Supplementary Figure S1 DMSO enhances definitive endodermal differentiation from Toe.**

Toe was used to confirm whether or not the DMSO potentiation of Activin-mediated definitive endoderm (DE) differentiation is conserved among cell lines. (A) A schematic representation of DE differentiation from Toe. (B, C) 0.8% DMSO promoted DE differentiation by Activin at 100 ng/ml, as shown by immunocytochemistry. Representative images are shown in C. Scale bar; 50  $\mu\text{m}$ .

## **Supplementary Figure S2 DMSO enables a low concentration of Activin to induce DE differentiation from Toe.**

Toe was used to confirm whether or not the DMSO potentiation of low dose Activin-mediated DE differentiation is conserved among cell lines. (A) A schematic representation of DE differentiation from Toe. (B) In the presence of 0.8% DMSO, Activin at 6.25 ng/ml could induce DE differentiation from Toe. Scale bar; 50  $\mu\text{m}$ .

### **Supplementary Figure S3 DMSO was required during all periods of DE differentiation**

The differentiation period was subdivided into 0–48 h and 48–96 h, during which periods 201B7 cells were differentiated by adding Activin alone (A) or in combination with DMSO (AD).

(A) DE differentiation was subdivided into 2 time windows, during which Activin (A) combined with/without DMSO (D) was added to the differentiation media. (B and C) Immunocytochemical analysis of SOX17 expression in cells treated with A and D during the 2 time windows are shown.

Without DMSO Activin induced DE differentiation at low efficiencies from hiPS cells. Scale bar; 50  $\mu\text{m}$ .

### **Supplementary Figure S4 DMSO promoted mesodermal differentiation.**

We examined whether DMSO also promoted mesodermal differentiation from 201B7. (A) A schematic representation of mesodermal differentiation from 201B7. (B) 0.8% DMSO enhanced mesodermal differentiation induced by Activin at 100 ng/ml and BMP4 at 40 ng/ml. BRACHYURY-expressing cells increased by DMSO. (C and D) DMSO enabled a low concentration of BMP4 to induced mesoderm. (C) BMP4 at 2.5 ng/ml could not induced BRACHYURY-expressing cells. At the presence of 0.8% DMSO, Activin at 6.25 ng/ml and BMP4 at 2.5 ng/ml induced mesodermal differentiation of 201B7. (D) The representative immunofluorescence images of BRACHYURY-expressing cells. A6.25, Activin at 6.25 ng/ml. B2.5, BMP4 at 2.5 ng/ml. (E) Real-time PCR analysis of mesodermal markers. DMSO increased BRACHYURY and MESP1. Scale bar; 50  $\mu\text{m}$ .

### **Supplementary Figure S5 Posterior endodermal cells from Toe**

Immunocytochemistry of SOX17 and CDX2. DE induced by Activin in the presence of DMSO could differentiate into posterior endodermal cells. Scale bar; 100  $\mu\text{m}$ .

**Supplementary Figure S6 Other endodermal lineages were differentiated from hiPS cells by Activin at 6.25 ng/ml with DMSO**

(A) DE induced by Activin at 6.25 ng/ml with DMSO was subjected to hepatic (Hep), pancreatic (Panc) or anterior foregut (AFG) differentiation. A low dose of Activin (6.25 ng/ml) with DMSO induced hiPS cells to differentiate into ALB<sup>+</sup>/CK19<sup>+</sup> hepatoblasts (B), magnified images of the boxed areas depicted with white broken lines are shown (B). PDX1<sup>+</sup> pancreatic progenitor (C) or SOX2<sup>+</sup> anterior foregut cells (D). HepG2, a hepatocellular carcinoma cell line [S 1, S2], is used as a positive control of immunocytochemistry for ALB and CK19 expression. CYC; KAAD-Cyclopamine. RA; Retinoic acid. SB; SB431542. Nog; Noggin. Scale bar; 100  $\mu$ m.

**Supplementary Figure S7 Un-cropped gel images of western blotting and RT-PCR**

Uncropped gel images of western blotting data in Figure 3 (A) and RT-PCR analysis data in Figure 5 (B). (A) Lane 1; Control cells. Lane 2; Activin-treated cells. Lane3; DMSO-treated cells. Lane 4; Activin and DMSO-treated cells. The samples were derived from the same experiments and the gels were processed in parallel.(B) Lane 1; Day6. Lane 2; Day15. Lane 3; Fetal intestine (positive control). Lane 4; Adult intestine (positive control). Lane 5; DW, water (negative control). Lane 6; Activin-treated cells. Lane 7; Activin/DMSO-treated cells. Lane 8; DW (negative control). The samples (Day 6, 15, positive & negative controls) were derived from the same experiments and the gels were processed in parallel.

- S1. Knowles BB, Howe CC, Aden DP. Human hepatocellular carcinoma cell lines secrete the major plasma proteins and hepatitis B surface antigen. *Science* **209**, 497-499 (1980).
- S2. Yoneda N, *et al.* Epidermal growth factor induces cytokeratin 19 expression accompanied by increased growth abilities in human hepatocellular carcinoma. *Lab Invest* **91**, 262-272 (2011).

**Table S1 Primer sequences used for RT-PCR analysis**

Primer sequences used for detection of gene expression in Fig. 5.

| Gene    | Forward primer          | Reverse primer              |
|---------|-------------------------|-----------------------------|
| CDX2    | GAGGGGGTGGTTATTGGACT    | AGGAAGTCCAGGTTGGCTCT        |
| VILLIN  | ACTTCTATGGGGGCGACTG     | ATGCGTCCCTTGAAGATGG         |
| MDR1    | CTTATGCTCTGGCCTTCTGG    | GGAGATGCCTGTCCAACACT        |
| MRP3    | TCTGTCCTGGCTGGAGTCG     | TCAGCTTGATGCGCGAGTC         |
| OATP2B1 | CTTCATCTCGGAGCCATACC    | GCTTGAGCAGTTGCCATTG         |
| EAAC1   | CCTGGTGTCACCCAGAAAGT    | GAAAACAGGCCTGGACAAGA        |
| TAUT    | AGGGAACTGAGGTGCAGAGA    | CTGGAAGGAGAGCATCCAAG        |
| CYP3A4  | CAGGAGGAAATTGATGCAGTTTT | GTCAAGATACTCCATCTGTAGCACAGT |
| CYP2E1  | GAAAACGAGTGTGTGCTGGA    | CGGGGAATGACACAGAGTTT        |
| CES2    | AATCCCAGCTATTGGGAAGGA   | CTGGCTGGTCCGGTCTCAAAC       |
| GAPDH   | CGAGATCCCTCCAAAATCAA    | CATGAGTCCTTCCACGATACCAA     |

# Supplementary Figure. S1

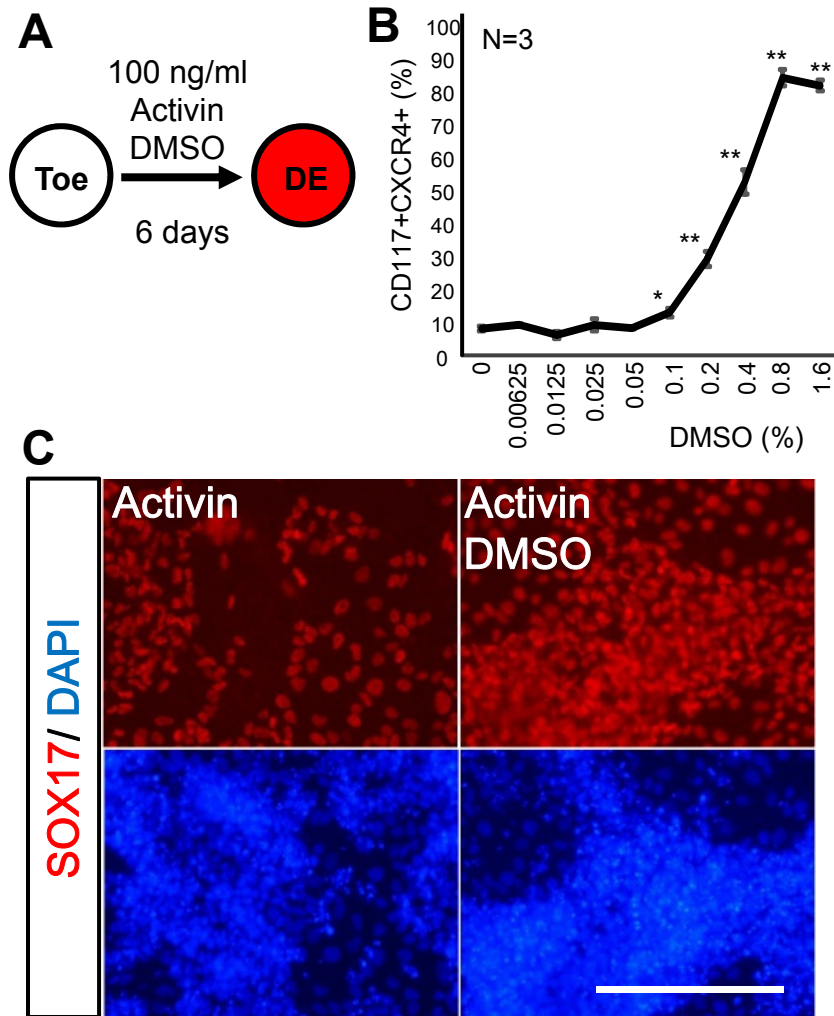

## Supplementary Figure. S2

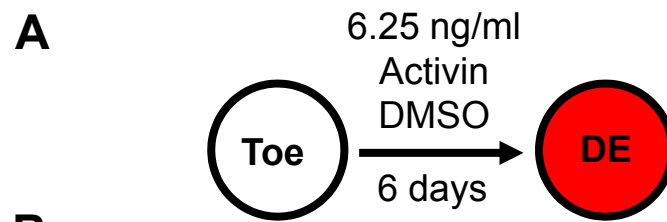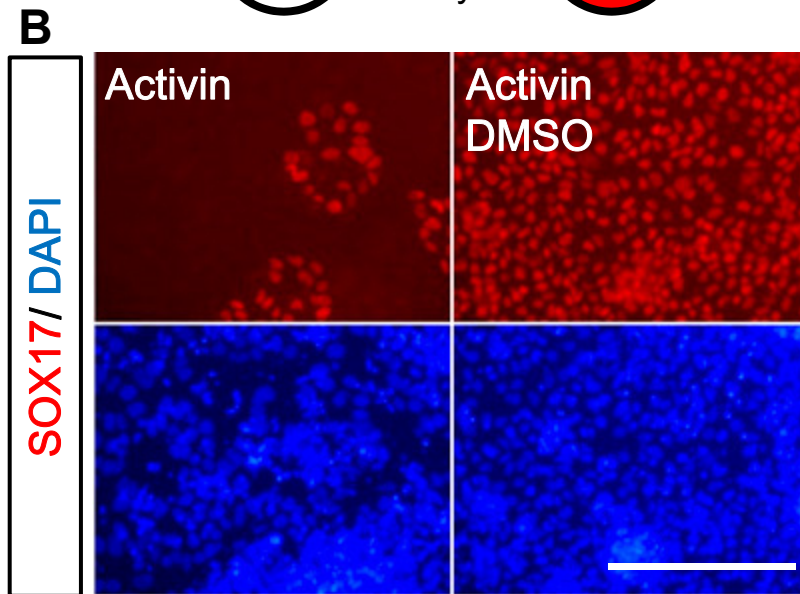

# Supplementary Figure. S3

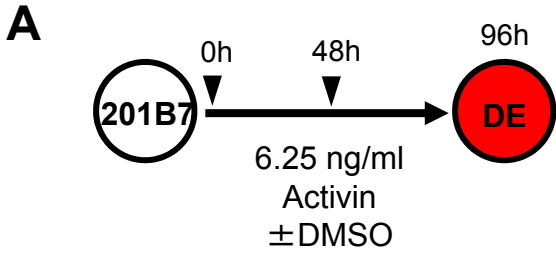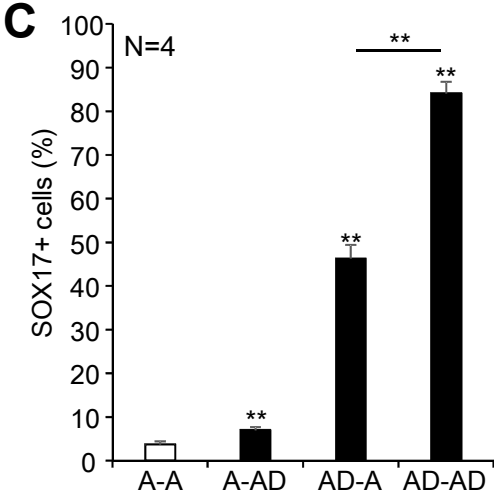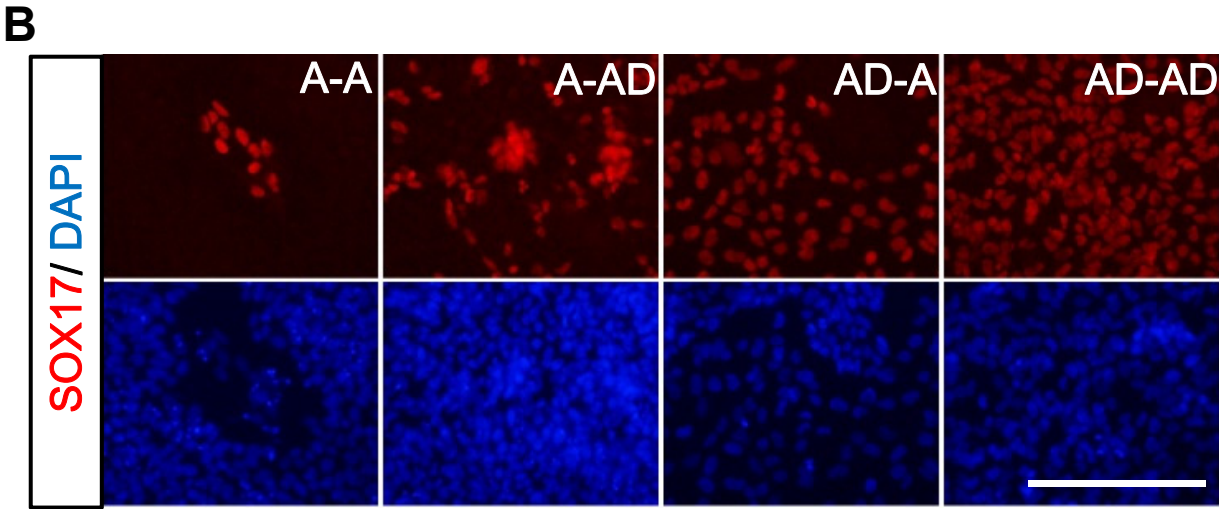

# Supplementary Figure. S4

**A**

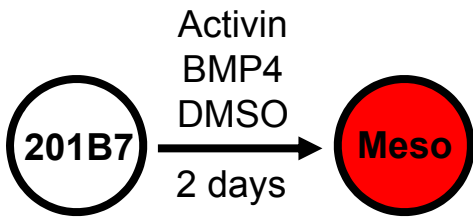

**B**

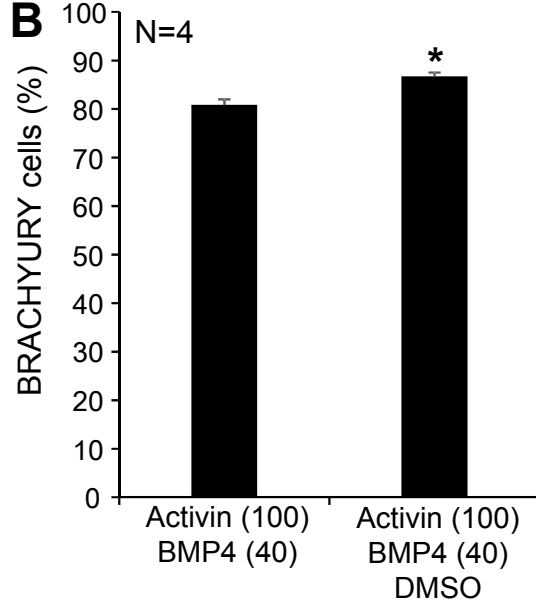

**C**

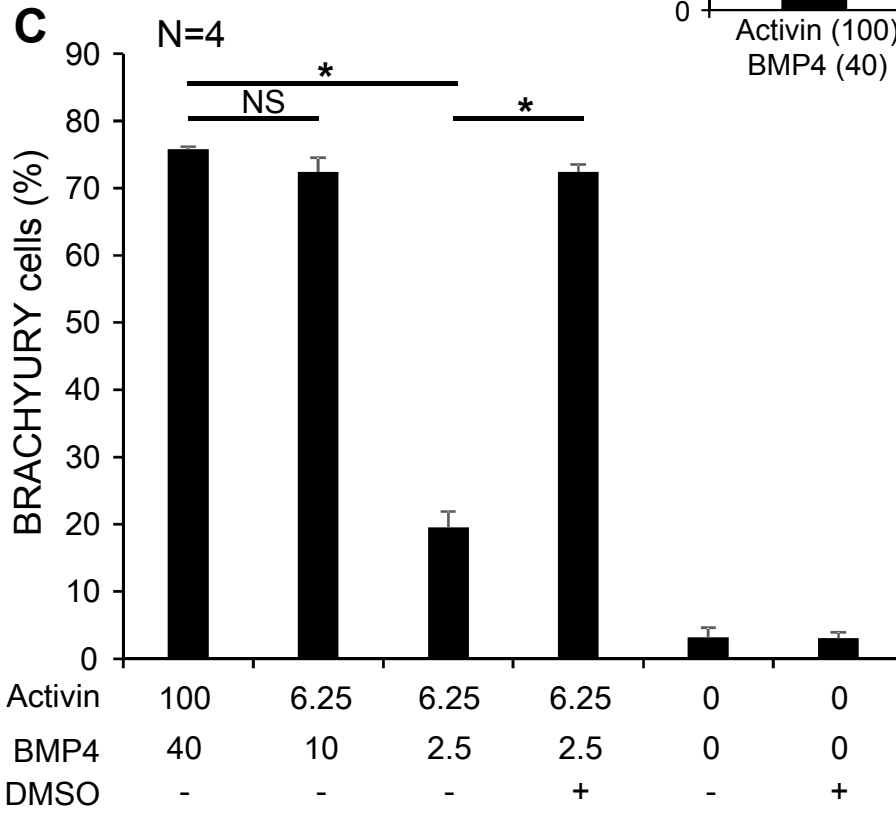

**D**

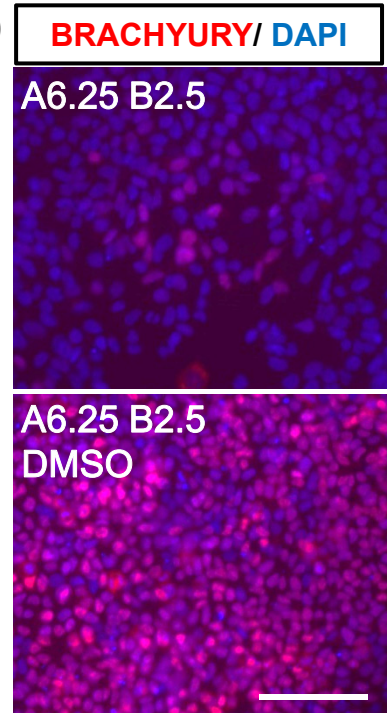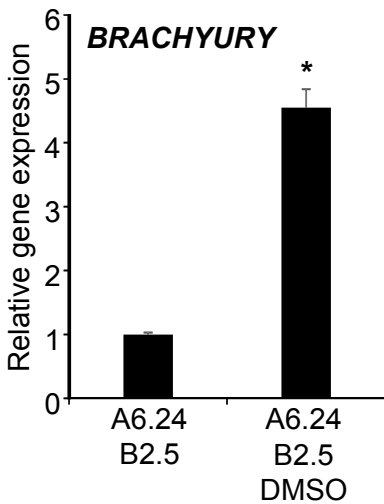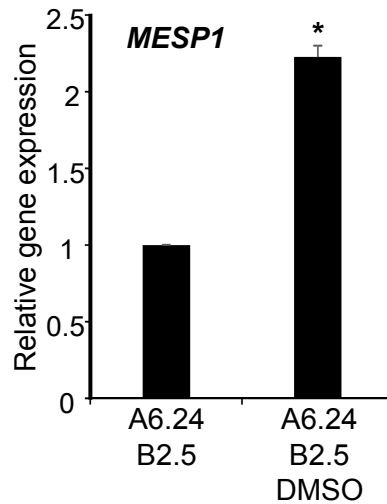



**Supplementary Figure. S5**

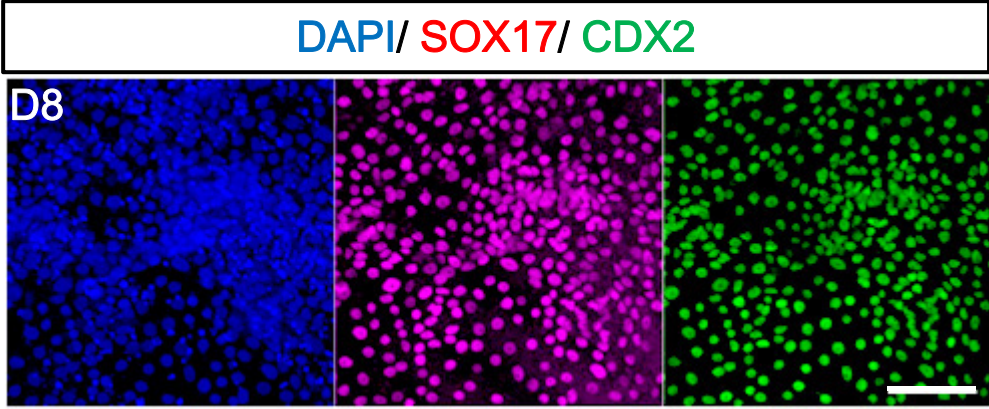

# Supplementary Figure. S6

**A**

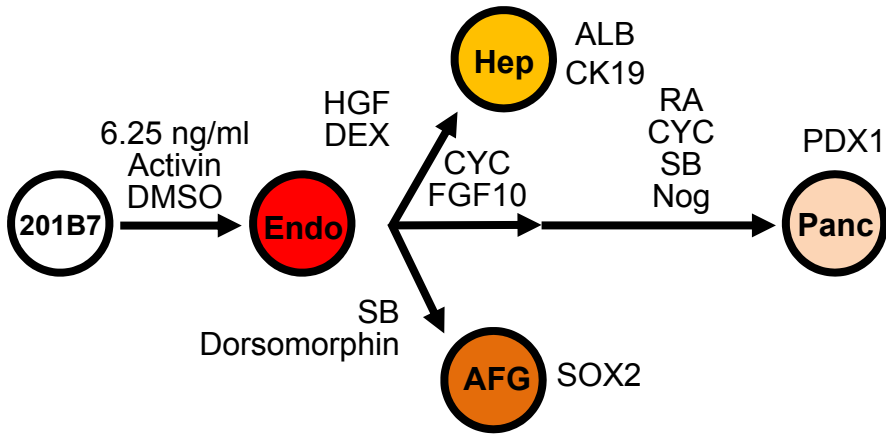

**B**

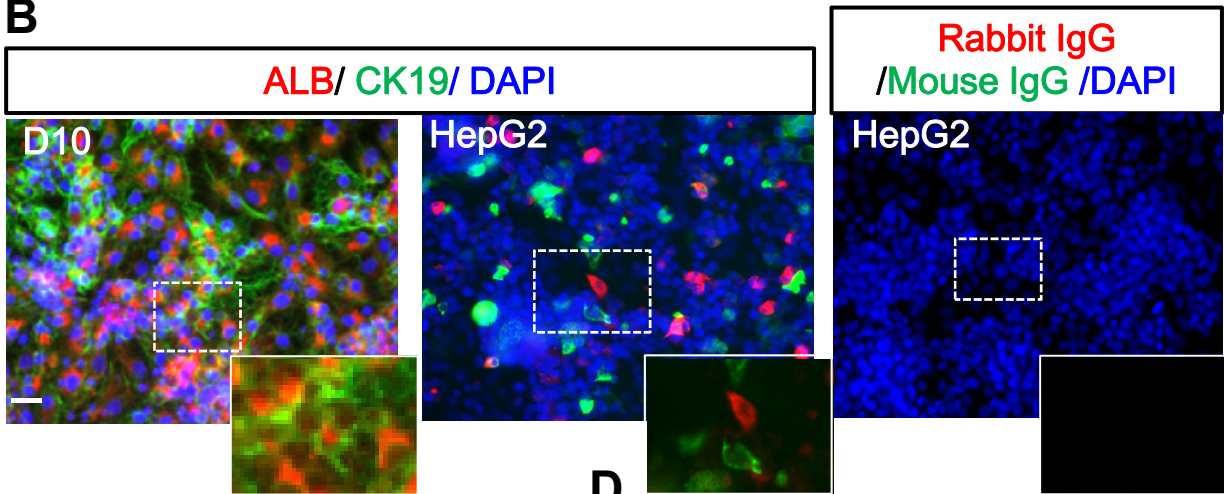

**C**

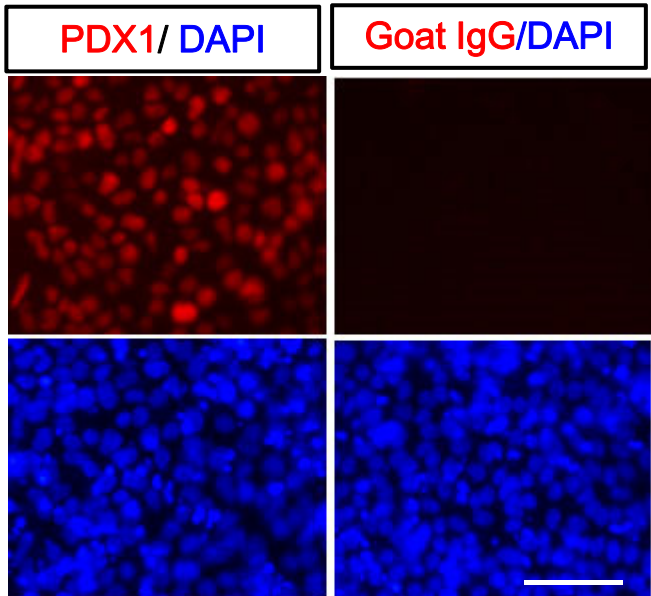

**D**

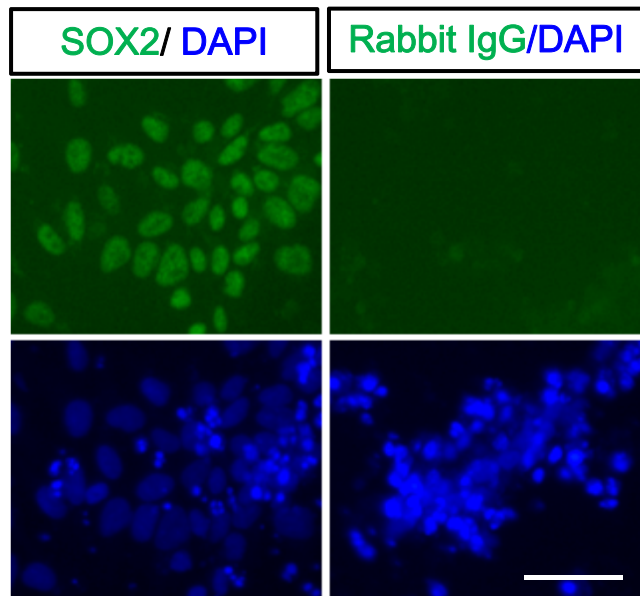

# Supplementary Figure. S7

(A) Figure. 3

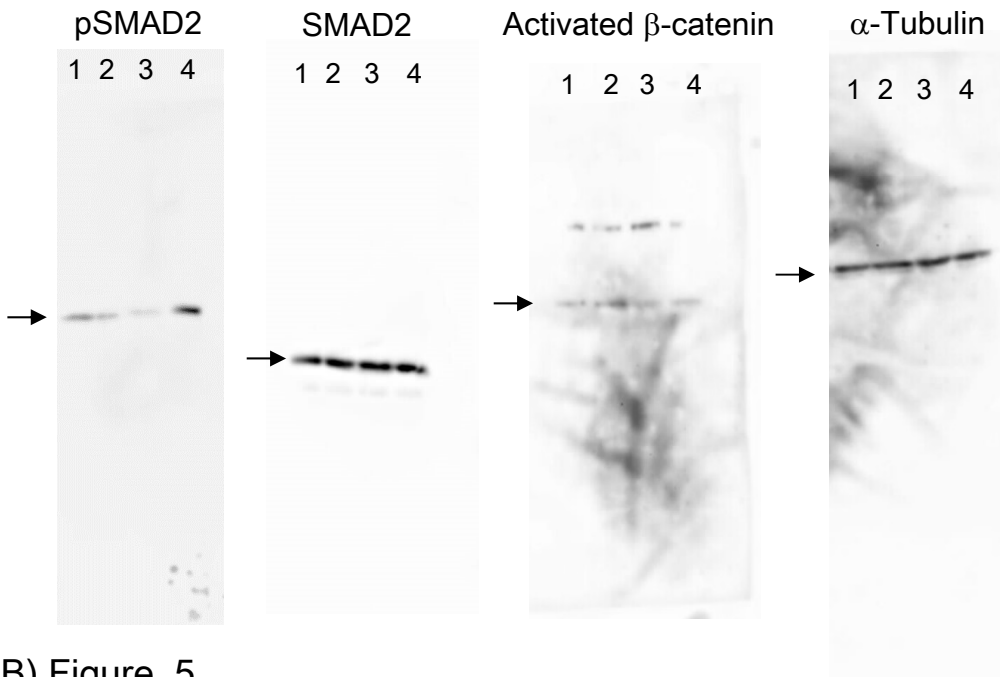

(B) Figure. 5

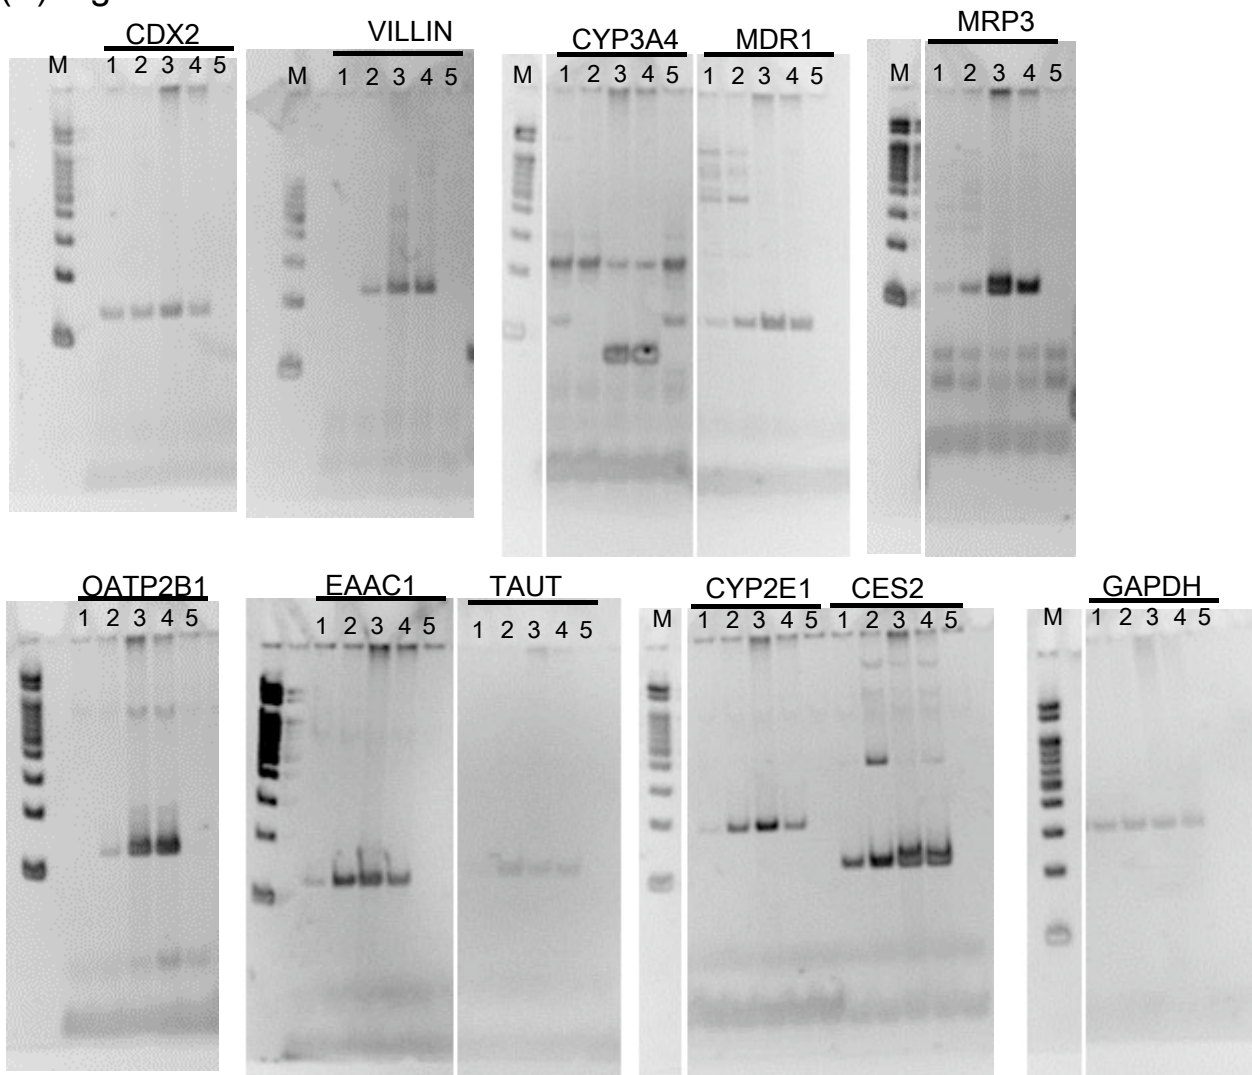

Supplement: srep17297-s1.pdf [file srep17297-s1.pdf]
